# Supplementary material for: Make it spin: individual trapping of sperm for analysis and recovery using micro-contact printing
Source: Royal Society of Chemistry journal article supplement (doi:10.1039/c4lc00050a), 2014-01-01
Supplement: c4lc00050a6.pdf [file c4lc00050a6.pdf]

## Supplementary information

### Make it Spin: Individual Trapping of Sperm for Analysis and Recovery Using Micro-Contact Printing

#### Figures

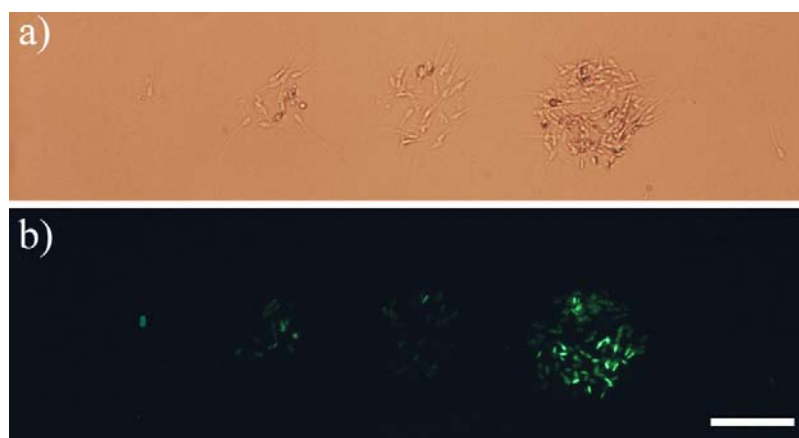

**Supplementary Fig. 1** Patterning sperm with  $\mu$ CP on smaller fibronectin spots. a) Sperm trapping on (from left to right) 10, 25, 40 and 50  $\mu$ m fibronectin spots. b) Viability staining with LIVE/DEAD Sperm Viability Kit shows 100% sperm cell viability (green). Single sperm capture on a 10  $\mu$ m fibronectin spot is shown. Scale bar 50  $\mu$ m.

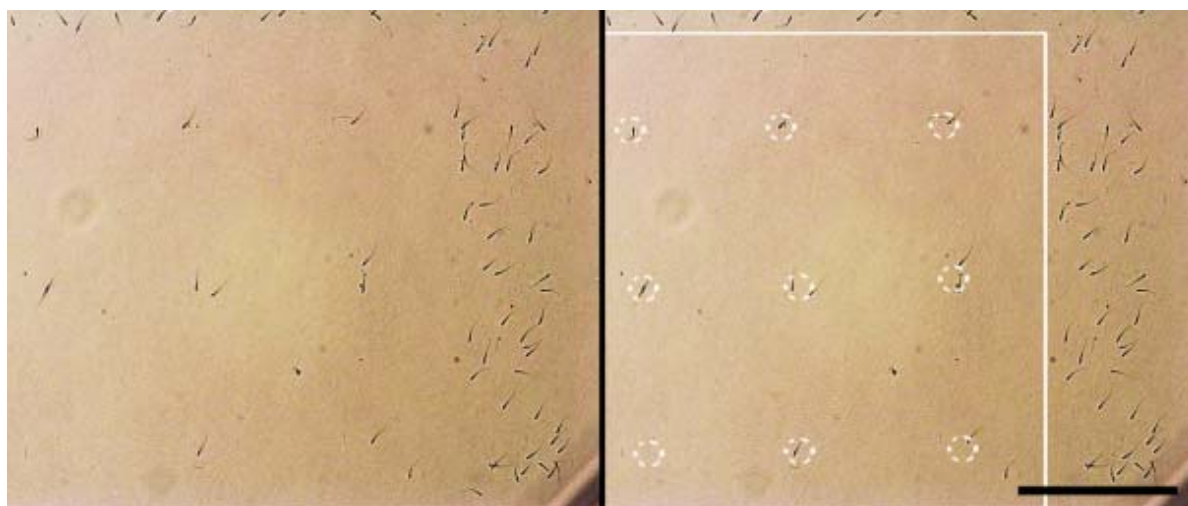

**Supplementary Fig. 2** Arraying single sperm. Single sperm trapping on 3 x 3 10  $\mu$ m fibronectin spot arrays (indicated by the dashed circles on the right), showing 8 out of 9 spots contained sperm, with 2 spots in the middle row showing double trapping. Scale bar 100  $\mu$ m.

## **Movies**

In total five movies are submitted as supplementary information. The descriptions of these movies are given below.

**Movie S1** Overview of 50  $\mu\text{m}$  spot arrays with sperm patterned. Video has been modified to aid visualization.

**Movie S2** Zoom of a 50  $\mu\text{m}$  fibronectin spot with sperm patterned.

**Movie S3** Array of single sperm. Note the landing on a spot of a sperm at 26 s.

**Movie S4** Additional array of single sperm.

**Movie S5** a) Array of single sperm and b) resulting software detection.
